# Supplementary material for: LINE-1 and Alu retrotransposition exhibit clonal variation
Source: PubMed Central journal article supplement (PMC3716877; doi:10.1186/1759-8753-4-16), 2013-06-03

# Supplementary Figure 1

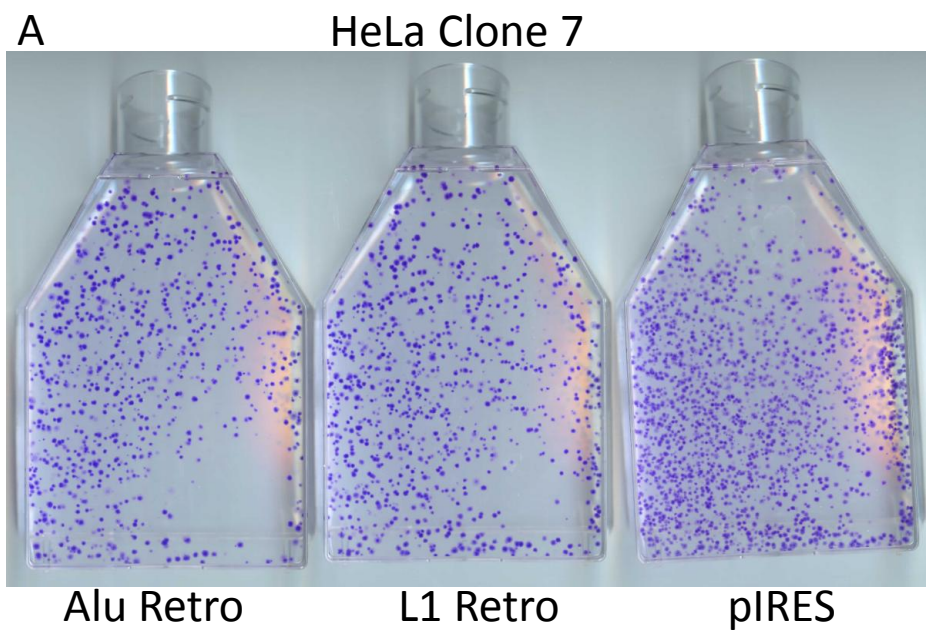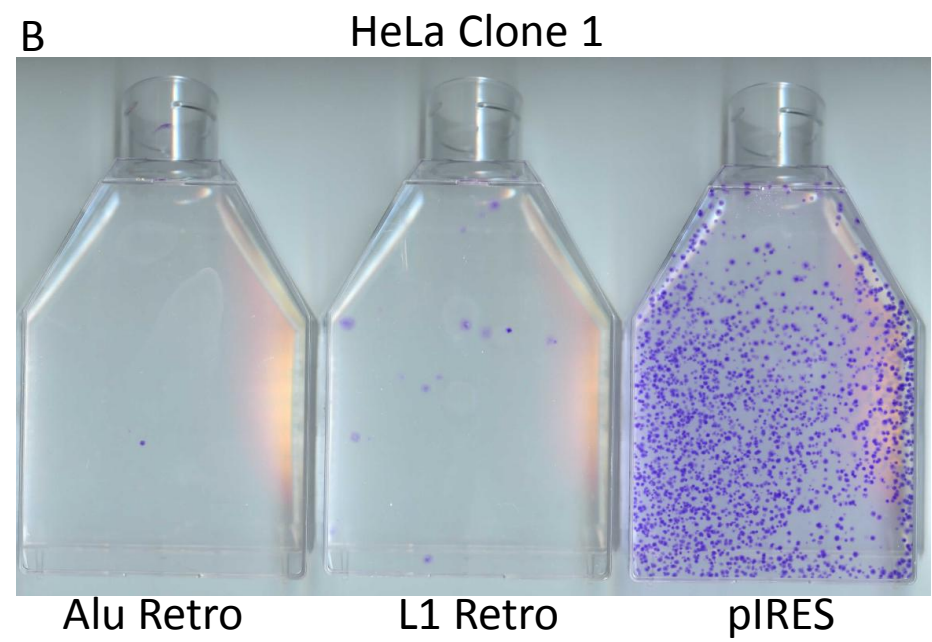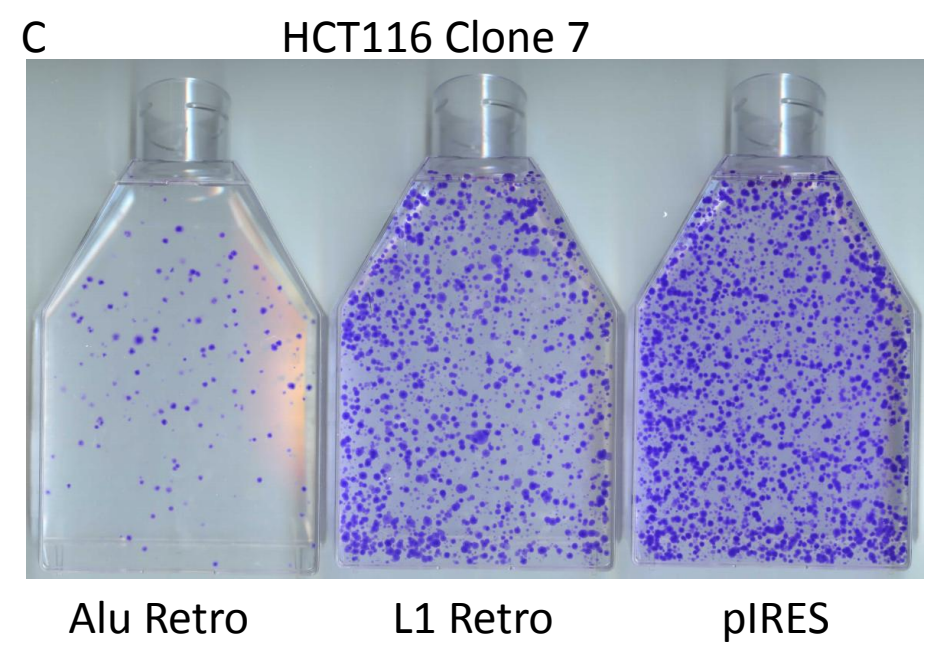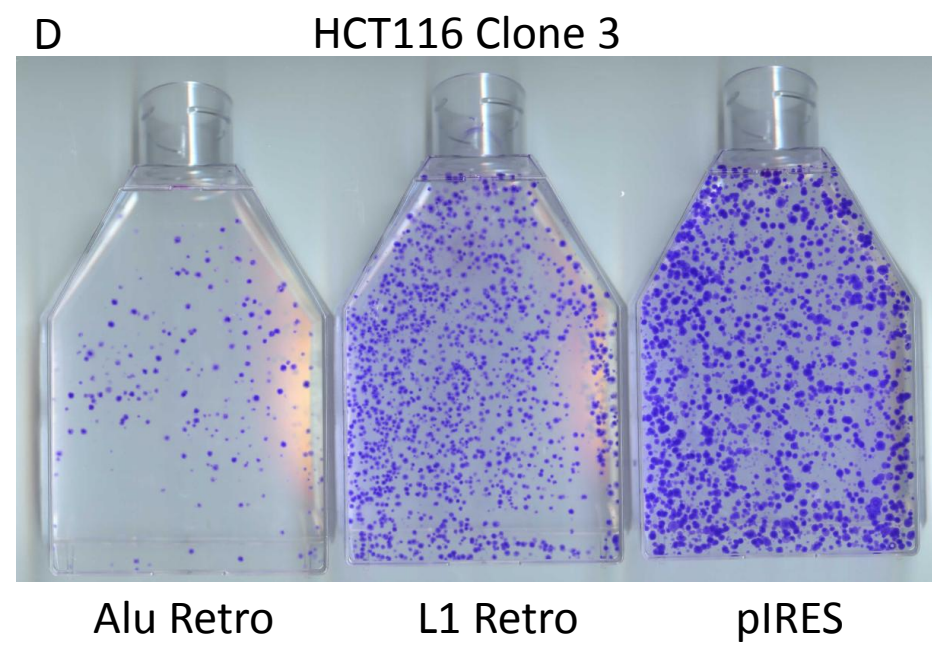

Supplement: 1759-8753-4-16-S1.pdf [file 1759-8753-4-16-S1.pdf]
